# Supplementary material for: Oxidized multiwall carbon nanotube/silicone foam composites with effective electromagnetic interference shielding and high gamma radiation stability
Source: Royal Society of Chemistry journal article supplement (doi:10.1039/c8ra03314e), 2018-01-01
Supplement: c8ra03314e1.pdf [file c8ra03314e1.pdf]

## Supporting Information

# Oxidized multiwall carbon nanotubes/silicone foam composites with effective electromagnetic interference shielding and high gamma radiation stability

*Furong Huang<sup>a</sup>, Yimeng Wang<sup>a</sup>, Peiyu Wang<sup>b</sup>, Huiling Ma<sup>c</sup>, Xibang Chen<sup>a</sup>, Ke Cao<sup>c</sup>,*

*Yongmao Pei<sup>b</sup>, Jing Peng<sup>a</sup>, Jiuqiang Li<sup>a</sup> and Maolin Zhai<sup>a\*</sup>*

<sup>a</sup> Beijing National Laboratory for Molecular Sciences, Radiochemistry and Radiation Chemistry Key Laboratory of Fundamental Science, the Key Laboratory of Polymer Chemistry and Physics of the Ministry of Education, College of Chemistry and Molecular Engineering, Peking University, Beijing 100871, China.

<sup>b</sup> State Key Laboratory for Turbulence and Complex Systems, College of Engineering, Peking University, Beijing 100871, China

<sup>c</sup> Beijing Key Laboratory of Radiation Advanced Materials, Beijing Research Center for Radiation Application, Beijing 100015, China

\* Corresponding author. Tel: 86-10-62753794. E-mail: [mlzhai@pku.edu.cn](mailto:mlzhai@pku.edu.cn)

## 1. Oxidation of MWCNTs

4 g of MWCNTs were dispersed in 80 mL of the mixture of nitric acid and sulfuric acid in ratio 1:1 in a 250 mL round bottom flask with a condenser and the dispersion was refluxed while stirring for 5 h at 110 °C.

The o-MWCNTs were purified as follow: the resulting dispersion was diluted in 600 mL water, stirred for 2 h and left standing overnight. Then the dispersion was filtered and the resulting solid was washed up to neutral pH. After the purification process, o-MWCNTs were dried in the oven at 100 °C overnight.

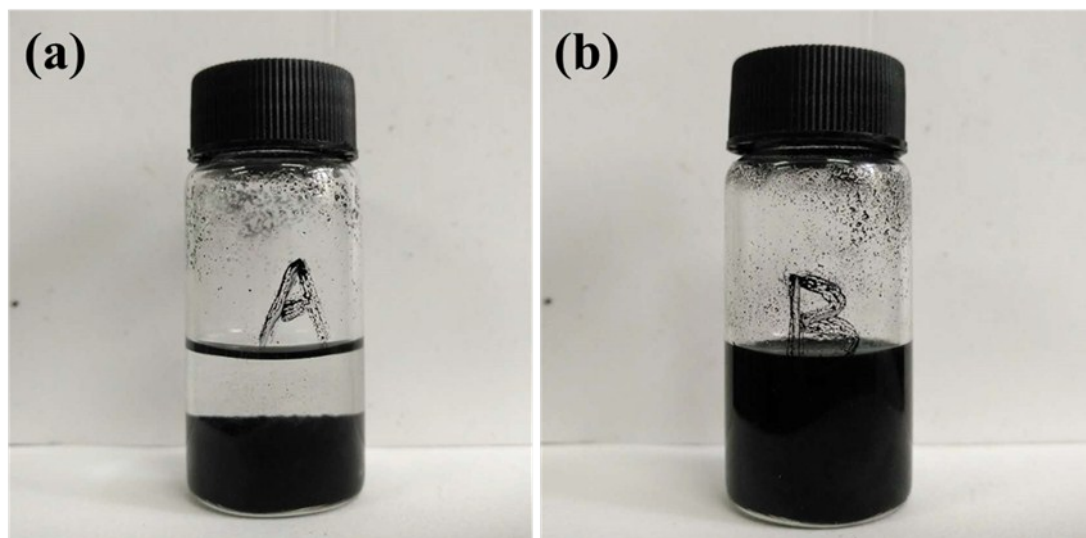

**Figure S1** Optical images of the dispersion of: (a) 10 wt% MWCNTs/THF; (b) 10 wt% o-MWCNTs/THF. The samples were stirred for 1 h and left standing for 1 h.

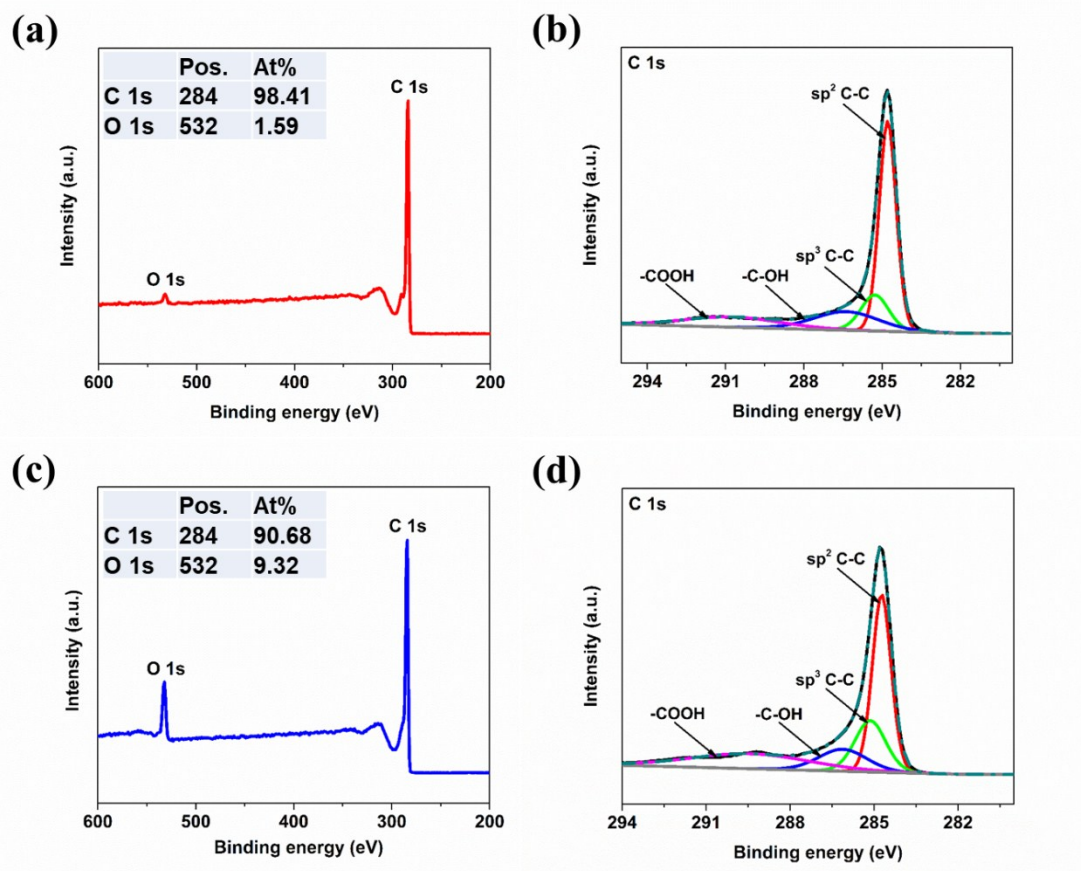

**Figure S2** XPS spectra of (a) MWCNTs; (b) C 1s peaks of MWCNTs; (c) o-MWCNTs; (d) C 1s peaks of o-MWCNTs

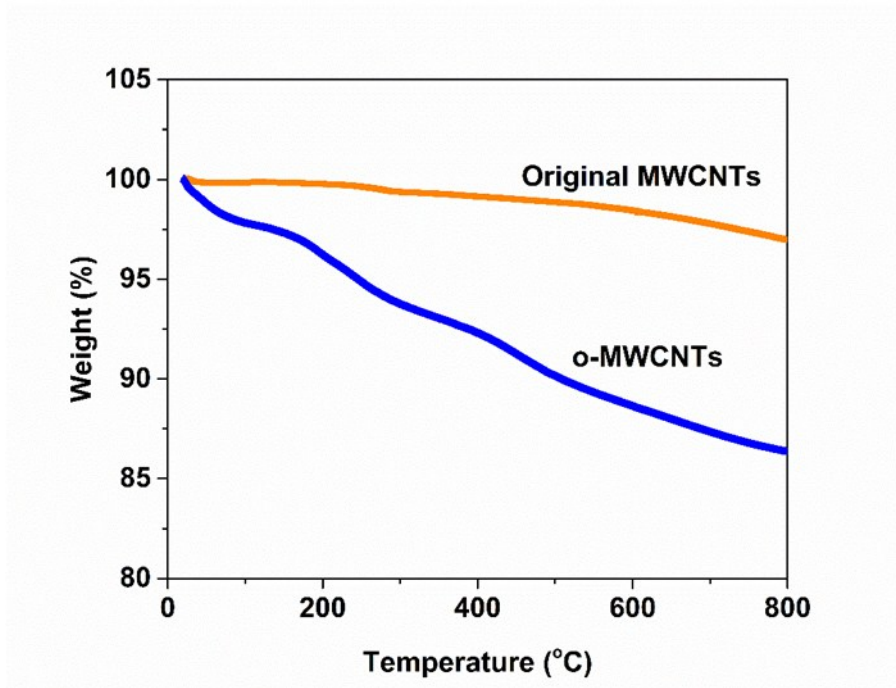

**Figure S3** TG curves of original MWCNTs and o-MWCNTs.

## 2. Shielding Mechanism

The reflection (R), transmission (T) and absorption (A) coefficients were calculated by Eq. (1) - (3) based on the S parameters.

$$R + A + T = 1 \quad (1)$$

$$R = |S_{11}|^2 \quad (2)$$

$$T = |S_{12}|^2 \quad (3)$$

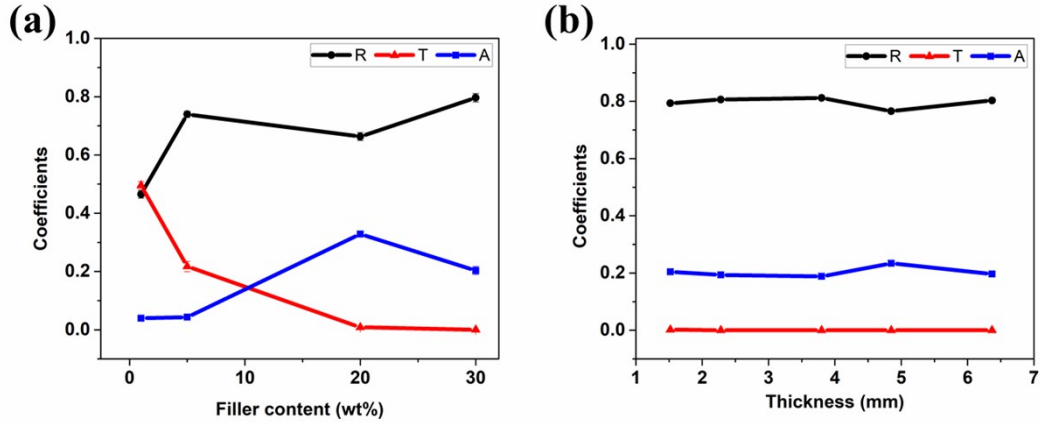

**Figure S4** The R, T and A coefficients as a function of (a) filler content and (b) thickness (30 wt% o-MWCNT) at 12.4 GHz.

### 3. Dielectric Characteristics

In electromagnetic field, it is more reasonable to express the parameters permittivity in a complex number with a real part ( $\epsilon'$ ) and an imaginary part ( $\epsilon''$ ) as follows:

$$\epsilon = \epsilon' - i\epsilon'' \quad (4)$$

where  $\epsilon'$  represents the storage ability of electric and  $\epsilon''$  symbolizes the dissipated electric energy.<sup>1</sup> The dielectric tangent loss is defined as the ratio of the imaginary part to the real part ( $\tan \delta = \epsilon''/\epsilon'$ ) to quantify the coupling ability of dielectric materials with the electromagnetic waves. Alternating current (AC) conductivity ( $\sigma_{AC}$ ) of silicone composites can be calculated from the imaginary part of complex permittivity using the following formula:

$$\sigma_{AC}(S/m) = 2\pi f \epsilon_0 \epsilon'' \quad (5)$$

Where  $f$  is the frequency and  $\epsilon_0$  represents the permittivity of free space (

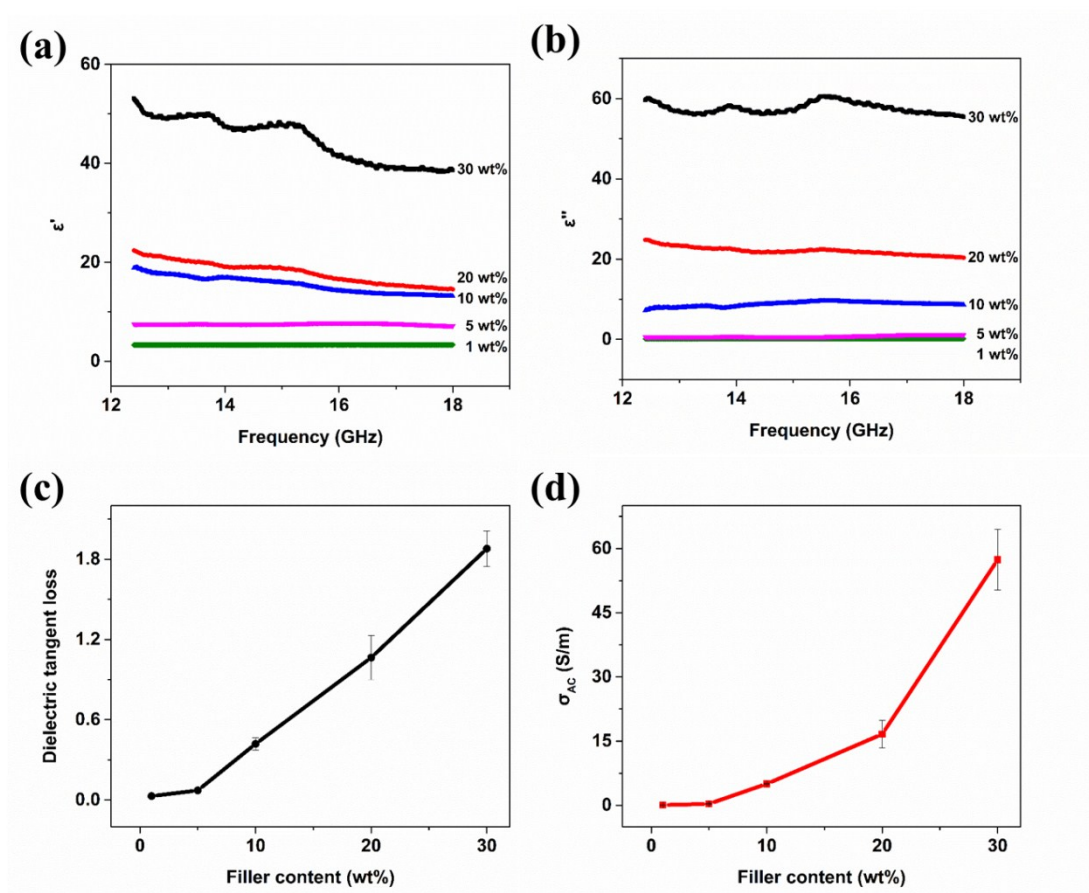

$$\epsilon_0 = 8.854 \times 10^{-12} \text{ F/m} \quad 2$$

**Figure S5** (a) Real part and (b) imaginary part of complex permittivity of o-MWCNT/silicone foam composites as a function of frequency with various o-MWCNT content; (c) the corresponding dielectric tangent loss and (d) AC conductivity at 12.4 GHz of o-MWCNT/silicone foam composites as a function of o-MWCNT content.

## REFERENCES

- 1 A. Kumar, A. P. Singh, S. Kumari, P. K. Dutta, S. K. Dhawan and A. Dhar, *J. Mater. Chem. A*, 2014, **2**, 16632-16639.
- 2 M. H. Al-Saleh, W. H. Saadeh and U. Sundararaj, *Carbon*, 2013, **60**, 146-156.
